# Supplementary material for: Comparative analysis of lingual bracket transfer accuracy using fully versus partially enclosed 3D-printed indirect bonding trays: an in vivo study
Source: PeerJ. 2025 Jun 17;13:e19612. doi: 10.7717/peerj.19612 (PMC12180451; doi:10.7717/peerj.19612)
Supplement: Supplemental Information 1 [file peerj-13-19612-s001.xlsx]

## Sheet: Demographic
Group	Age	Gender	Extraction	Angle Class	Bonding time upper	Bonding time lower	Failure	No teeth	Scan error	No teeth analysis	Crowding upper	Crowding lower
FE	26	F	N	I	37	35	0	28	0	28	-1.3	2.1
FE	29	F	Y	I	52	56	0	24	0	24	1.6	1.1
FE	27	M	Y	II	38	46	0	24	0	24	-0.5	1.2
FE	30	F	N	I	39	44	0	26	0	26	1.1	7.7
FE	28	F	Y	III	51	43	0	23	0	23	2.9	7.3
FE	31	M	N	II	44	48	0	26	0	26	7.2	6.1
FE	23	F	Y	I	24	29	0	22	0	22	9.3	9.9
FE	35	F	N	I	41	45	0	24	0	24	5.2	11.6
FE	28	M	Y	I	43	47	3	23	0	20	0.6	3.4
FE	47	F	Y	II	39	41	0	25	0	25	1.9	-2.2
PE	30	F	N	I	33	36	0	28	0	28	3.9	3.7
PE	22	M	N	I	50	50	0	27	0	27	2.2	1.5
PE	29	F	Y	I	36	40	0	26	0	26	2.2	6.3
PE	26	F	Y	I	26	35	0	24	0	24	3.5	3.5
PE	25	M	Y	I	30	38	0	22	0	22	5.6	9.1
PE	28	F	Y	I	29	42	0	24	0	24	4.9	6.2
PE	30	M	Y	I	33	38	0	23	0	23	-3.6	6.1
PE	48	F	N	I	28	25	0	27	0	27	4.6	6.2
PE	23	F	N	I	25	35	0	28	0	28	2.3	5.1
PE	24	M	N	I	40	38	0	27	0	27	2.1	5.1

## Sheet: Transfer_error
Group	Tooth	Tooth type	mesial-distal	in-out	height	rotation	tip	torque
FE	11	anterior	0.086	0.0449	0.0251	0.315703	0.0381888	0.394785
FE	12	anterior	0.013	0.0663	0.086	0.724726	0.877817	0.278457
FE	13	anterior	0.0486	0.0215	0.096	0.508921	2.62264	1.4719
FE	14	premolar	0.065	0.022	0.4578	1.05755	1.33661	10.9693
FE	15	premolar	0.081	0.43	0.3278	4.43274	3.01682	9.69491
FE	16	molar	0.1365	0.236	0.1296	3.09992	0.426209	2.70801
FE	17	molar	0.0835	0	0.1324	0.719247	1.4084	1.44908
FE	21	anterior	0.0564	0.04	0.1365	0.80802	0.267159	0.0183463
FE	22	anterior	0.1223	0.169	0.0109	1.03129	0.360424	2.25675
FE	23	anterior	0.01	0.051	0.128	2.49978	4.49749	1.46316
FE	24	premolar	0.046	0.1634	0.3372	0.102123	0.79412	3.48645
FE	25	premolar	0.091	0.029	0.2076	4.01553	0.934449	1.50455
FE	26	molar	0.28	0.214	0.1446	1.45937	0.226256	0.122213
FE	27	molar	0.222	0.0089	0.2237	0.372092	1.31534	0.779619
FE	31	anterior	0.1225	0.021	0.022	1.40866	0.143719	1.29335
FE	32	anterior	0.113	0.031	0.0353	0.599386	2.09273	1.31027
FE	33	anterior	0.0773	0.0358	0.057	0.328073	2.32851	2.15164
FE	34	premolar	0.0391	0.11	0.2969	5.57246	1.85632	3.01081
FE	35	premolar	0.2491	0.298	0.2994	4.40586	1.69683	9.7798
FE	36	molar	0.0997	0.121	0.07	2.20327	0.966552	1.50792
FE	37	molar	0.0927	0.427	0.0791	5.73303	5.27141	0.653362
FE	41	anterior	0.067	0.081	0.072	0.468416	0.413664	2.93113
FE	42	anterior	0.021	0.117	0.009	1.742	2.76211	1.48741
FE	43	anterior	0.1974	0.253	0.028	8.22399	4.93728	2.21127
FE	44	premolar	0.079	0.2346	0.089	1.68012	0.928622	6.20199
FE	45	premolar	0.111	0.1392	0.0517	2.44818	0.906973	5.42687
FE	46	molar	0.126	0.068	0.1301	0.835374	0.800443	2.35336
FE	47	molar	0.224	0.015	0.0474	0.449528	1.6952	2.359
FE	11	anterior	0.005	0.043	0.0106	0.538384	0.437365	1.69504
FE	12	anterior	0.0122	0.128	0.154	0.74149	0.0212153	5.12856
FE	13	anterior	0.01	0.091	0.21	0.926631	1.13782	0.428934
FE	15	premolar	0.048	0.018	0.1202	0.619173	1.22726	0.582956
FE	16	molar	0.0883	0.102	0.1606	0.465651	0.0131391	0.779588
FE	17	molar	0.26	0.089	0.012	0.39477	2.64492	1.34639
FE	21	anterior	0.0128	0.052	0.033	0.728002	1.59666	3.24092
FE	22	anterior	0.0114	0.159	0.183	0.330442	0.237406	4.26087
FE	23	anterior	0.089	0.282	0.202	0.442895	0.0135501	11.4448
FE	25	premolar	0.242	0.082	0.012	1.61694	1.09252	0.0901138
FE	26	molar	0.0874	0.162	0.1115	0.293341	0.184877	0.802971
FE	27	molar	0.0543	0.188	0.021	0.414386	0.448597	1.20265
FE	31	anterior	0.0146	0.116	0.1571	0.71702	2.19589	0.90461
FE	32	anterior	0.082	0.293	0.051	3.12361	0.615655	4.89605
FE	33	anterior	0.1428	0.11	0.0458	1.154	5.04702	1.85563
FE	34	premolar	0.1482	0.051	0.5428	1.20371	0.306479	1.0545
FE	36	molar	0.2844	0.164	0.3292	2.01227	1.19573	2.48277
FE	37	molar	0.0046	0.328	0.1695	0.473503	0.777681	1.55267
FE	41	anterior	0.0791	0.107	0.086	0.117802	3.20838	4.66051
FE	42	anterior	0.1064	0.157	0.054	4.71016	2.45048	3.6892
FE	43	anterior	0.0574	0.075	0.097	0.147746	2.76044	3.54082
FE	44	premolar	0.0415	0.0819	0.3813	0.914061	1.77227	1.36392
FE	45	premolar	0.021	0.034	0.1634	0.414395	1.79871	0.964031
FE	47	molar	0.454	0.207	0.051	2.60993	0.29471	1.60008
FE	11	anterior	0.0103	0.136	0.0606	0.0750971	0.638517	1.31841
FE	12	anterior	0.12	0.17	0.059	0.692006	2.75609	3.69812
FE	13	anterior	0.0157	0.102	0.168	1.55779	1.46151	2.06267
FE	15	premolar	0.042	0.1408	0.3418	0.203378	0.866787	1.95392
FE	16	molar	0.0341	0.0906	0.1912	1.24313	1.15373	2.69585
FE	17	molar	0.059	0.057	0.0384	2.76341	0.554053	3.25922
FE	21	anterior	0.047	0.126	0.115	1.08061	0.0697984	0.26414
FE	22	anterior	0.0047	0.265	0.073	1.20688	1.76369	1.76071
FE	23	anterior	0.201	0.125	0.0408	1.02308	1.02626	12.0904
FE	25	premolar	0.042	0.23	0.2964	1.90768	1.387	3.43448
FE	26	molar	0.139	0.0411	0.0438	0.461731	0.315587	2.96026
FE	27	molar	0.061	0.115	0.054	1.65867	2.02501	3.05322
FE	31	anterior	0.032	0.067	0.034	0.897238	0.170563	2.33971
FE	32	anterior	0.0713	0.106	0.104	1.81316	0.385009	3.11923
FE	33	anterior	0.0768	0.156	0.131	3.50989	3.68768	1.2523
FE	34	premolar	0.1006	0.087	0.6829	3.98784	0.420481	2.33987
FE	36	molar	0.0489	0.064	0.2456	1.24237	1.04502	1.06783
FE	37	molar	0.0407	0.094	0.106	0.0293354	0.188165	1.58354
FE	41	anterior	0.077	0.018	0.069	0.22388	1.03092	1.47599
FE	42	anterior	0.0187	0.075	0.177	1.2446	0.817035	4.54737
FE	43	anterior	0.017	0.078	0.157	0.547968	1.54248	4.30723
FE	44	premolar	0.075	0.017	0.1486	6.05286	3.91622	0.41363
FE	46	molar	0.031	0.106	0.145	0.0637657	0.0499146	1.75815
FE	47	molar	0.0093	0.182	0.078	1.06556	1.22629	1.44413
FE	11	anterior	0.0275	0.1577	0.0951	1.16046	1.93444	0.0553277
FE	12	anterior	0.2165	0.091	0.2205	0.261782	0.446432	0.474163
FE	13	anterior	0.2004	0.262	0.012	3.363	0.63263	2.58983
FE	14	premolar	0.0417	0.0771	0.1257	0.0124237	1.0181	1.28
FE	15	premolar	0.021	0	0.1717	1.39938	0.284216	0.515748
FE	16	molar	0.036	0.0223	0.192	2.92132	0.274709	1.02864
FE	17	molar	0.0016	0.0078	0.1616	0.672382	0.0459301	0.511251
FE	21	anterior	0.067	0.0865	0.064	0.551626	0.071523	0.188069
FE	22	anterior	0.2425	0.0611	0.131	0.119926	1.3856	3.50691
FE	23	anterior	0.1185	0.144	0.068	5.12298	4.01649	1.96238
FE	24	premolar	0.106	0.1165	0.1115	1.82354	0.265577	2.37773
FE	25	premolar	0.035	0.183	0.059	0.0398265	1.00261	3.72905
FE	26	molar	0.011	0.24	0.1353	3.02291	2.16598	2.07241
FE	27	molar	0.028	0.155	0.5957	2.48649	7.03491	14.5288
FE	31	anterior	0.087	0.008	0.0446	0.759637	2.04737	3.95972
FE	32	anterior	0.0405	0.094	0.1554	0.651544	1.11002	4.29808
FE	33	anterior	0.0503	0.154	0.029	0.654739	2.45709	3.27425
FE	34	premolar	0.1367	0.005	0.5623	3.87928	1.4048	6.1614
FE	36	molar	0.0624	0.0133	0.022	1.10548	0.809901	4.59647
FE	37	molar	0.0721	0.219	0.047	2.08342	1.62016	1.14243
FE	41	anterior	0.1663	0.112	0.0615	1.43423	0.41892	3.56352
FE	42	anterior	0.1075	0.116	0.073	3.55257	2.05386	6.26441
FE	44	premolar	0.0283	0.2267	0.1156	1.05022	2.05954	4.71838
FE	45	premolar	0.0378	0.136	0.1796	0.5266	0.0594427	2.35162
FE	46	molar	0.1	0.0591	0.1432	0.588792	0.357528	6.92965
FE	47	molar	0.025	0.048	0.066	0.444688	2.78915	4.38787
FE	11	anterior	0.184	0.0915	0.053	0.120571	0.370547	0.332451
FE	12	anterior	0.175	0.13	0.0029	0.27638	2.56518	0.35468
FE	13	anterior	0.043	0.097	0.0115	1.28248	0.890778	0.449869
FE	15	premolar	0.025	0.0803	0.095	0.0995054	1.2136	1.066
FE	16	molar	0.044	0.017	0.066	1.34381	0.475844	0.919494
FE	17	molar	0.0192	0.0135	0.1574	1.09482	0.84914	0.314865
FE	21	anterior	0.0266	0.112	0.0342	0.604792	1.46556	0.808123
FE	22	anterior	0.1	0.117	0.256	1.03584	1.42096	4.91874
FE	23	anterior	0.0647	0.383	0.2209	5.82398	5.31371	9.64506
FE	25	premolar	0.032	0.0623	0.1651	1.85958	0.642738	3.9179
FE	26	molar	0.0577	0.048	0.05	0.733549	0.473609	0.879505
FE	27	molar	0.109	0.1136	0.156	1.94859	1.82457	0.447196
FE	31	anterior	0.028	0.084	0.2437	0.116694	0.558259	1.76467
FE	32	anterior	0	0.047	0.2112	0.653218	1.20314	1.28336
FE	33	anterior	0.2324	0.098	0.03	0.16772	2.9171	2.31228
FE	35	premolar	0.007	0.011	0.2859	2.07925	1.4589	3.77626
FE	36	molar	0.002	0.1216	0.0743	0.372744	0.251028	2.53617
FE	37	molar	0.028	0.087	0.2166	1.63349	1.59299	0.286092
FE	41	anterior	0.0853	0.023	0.1917	0.433258	0.0251415	1.74595
FE	42	anterior	0.0337	0.073	0.1195	0.473593	1.85217	0.118475
FE	44	premolar	0.03	0.066	0.1507	0.767528	1.25366	4.7822
FE	46	molar	0.0024	0.224	0.2362	0.0807477	0.252698	5.93898
FE	47	molar	0.128	0.1461	0.1462	1.10969	1.00245	4.76209
FE	11	anterior	0.123	0.206	0.023	3.32434	0.57248	0.492971
FE	12	anterior	0.0001	0.147	0.141	1.6378	1.76139	7.94779
FE	14	premolar	0.019	0.009	0.069	6.63352	0.694368	6.0707
FE	15	premolar	0.095	0.195	0.0612	0.513559	1.17163	0.37483
FE	16	molar	0.0616	0.101	0.041	0.964752	0.374689	0.844989
FE	17	molar	0.059	0.0493	0.105	0.786791	1.81249	1.09227
FE	21	anterior	0.026	0.029	0.0924	0.575655	0.737226	1.16282
FE	22	anterior	0.0658	0.016	0.1339	0.304536	0.956856	0.430179
FE	23	anterior	0.048	0.0299	0.0247	1.04744	2.34332	0.600342
FE	24	premolar	0.048	0.1077	0.1473	0.287835	1.28003	2.77429
FE	25	premolar	0.0406	0.009	0.11	0.756171	1.06381	0.00717465
FE	26	molar	0.103	0.166	0.211	0.012776	1.56897	0.536894
FE	27	molar	0.066	0.1005	0.102	0.436719	2.16089	1.43533
FE	31	anterior	0.368	0.082	0.081	0.798353	0.850384	1.42048
FE	33	anterior	0.0414	0.032	0.0443	1.85333	0.79644	1.72987
FE	34	premolar	0.0305	0.0314	0.0874	1.24715	0.0910864	0.779195
FE	35	premolar	0.1523	0.011	0.303	0.132274	0.193018	1.23489
FE	36	molar	0.027	0.146	0.314	0.0231308	0.320118	2.50194
FE	37	molar	0.034	0.325	0.559	0.908561	1.15868	5.15542
FE	41	anterior	0.0272	0.099	0.072	1.97022	0.619149	4.48287
FE	42	anterior	0.0445	0.085	0.123	1.1824	1.49236	3.17146
FE	43	anterior	0.0119	0.0266	0.3815	0.0888298	1.5609	3.73828
FE	44	premolar	0.023	0.2018	0.086	2.53483	2.87758	15.088
FE	45	premolar	0.0713	0.213	0.292	0.282416	3.22721	3.21323
FE	46	molar	0.012	0.14	0.179	2.75932	1.82805	1.22569
FE	47	molar	0.038	0.24	0.157	0.260453	0.273362	1.00526
FE	11	anterior	0.036	0.031	0.1201	1.08928	1.57843	1.65412
FE	12	anterior	0.186	0.095	0.038	3.19177	1.68215	2.17318
FE	13	anterior	0.0758	0.037	0.029	0.196525	3.18523	0.726101
FE	15	premolar	0.1294	0.079	0.032	1.51752	2.24859	1.18931
FE	16	molar	0.1058	0.1394	0.0235	0.028814	0.0699101	4.06908
FE	17	molar	0.095	0.089	0.012	1.64824	0.502156	1.8495
FE	21	anterior	0.0809	0.087	0.041	0.428623	1.14933	1.4267
FE	22	anterior	0.088	0.221	0.2853	0.302249	0.956571	2.62961
FE	23	anterior	0.05	0.294	0.092	0.757757	3.36691	6.7154
FE	25	premolar	0.151	0.0503	0.0546	1.28986	0.323628	1.64545
FE	26	molar	0.025	0.1272	0.0545	1.11122	0.230113	3.11282
FE	27	molar	0.1178	0.0492	0.047	1.89774	0.314702	2.26671
FE	32	anterior	0.041	0.207	0.099	1.35759	3.03013	3.19124
FE	33	anterior	0.223	0.128	0.071	2.32674	5.27391	1.14481
FE	35	premolar	0.0165	0.048	0.088	0.654851	0.0338807	1.59481
FE	36	molar	0.0488	0.1631	0.084	0.492232	0.864422	4.22272
FE	37	molar	0.0246	0.0693	0.054	0.141135	0.809931	3.97306
FE	41	anterior	0.003	0.033	0.0273	0.539039	1.02051	0.210868
FE	42	anterior	0.1049	0.11	0.053	1.38078	1.14259	0.0168947
FE	45	premolar	0.258	0.1285	0.2037	4.21366	1.20068	0.585936
FE	46	molar	0.09	0.1243	0.073	0.855949	0.45397	2.38737
FE	47	molar	0.104	0.1058	0.1445	0.073607	1.40393	5.8888
FE	11	anterior	0.1358	0.099	0.0437	0.0578309	0.466141	1.4142
FE	12	anterior	0.1597	0.048	0.08	0.360468	4.20962	6.30264
FE	14	premolar	0.0291	0.043	0.2538	3.0528	5.01111	1.8139
FE	15	premolar	0.105	0.04	0.045	1.42303	6.66605	0.50567
FE	16	molar	0.039	0.105	0.013	0.464447	0.456123	1.29309
FE	17	molar	0.007	0.0203	0.1084	0.755969	5.64115	0.258513
FE	21	anterior	0.0024	0.044	0.0571	1.28724	0.522812	2.47501
FE	22	anterior	0.019	0.113	0.003	0.758162	0.13292	0.916888
FE	23	anterior	0.042	0.049	0.027	0.575041	0.343209	2.19804
FE	24	premolar	0.027	0.0634	0.2661	1.07134	7.09608	1.89409
FE	25	premolar	0.072	0.0169	0.1178	2.72591	6.70103	0.253704
FE	26	molar	0.049	0.083	0.063	0.793647	0.781502	0.397582
FE	27	molar	0.078	0.0002	0.0463	0.683554	5.25049	0.587224
FE	31	anterior	0.1484	0.161	0.4154	2.97574	2.6678	8.67835
FE	33	anterior	0.165	0.472	0.3504	6.95689	3.154	2.67718
FE	34	premolar	0.0224	0.107	0.3299	1.42405	2.41428	6.64866
FE	35	premolar	0.1337	0.138	0.292	0.347538	1.04703	0.231238
FE	36	molar	0.2542	0.09	0.042	0.0435051	0.114292	0.385341
FE	37	molar	0.161	0.1906	0.138	1.25858	0.480674	1.27637
FE	41	anterior	0.042	0.014	0.3529	3.93443	1.51786	1.02613
FE	42	anterior	0.1701	0.153	0.2617	1.6746	0.247899	0.0765143
FE	43	anterior	0.1557	0.603	0.2629	4.48345	3.90936	4.17647
FE	46	molar	0.0252	0.0184	0.0851	0.987751	1.24015	3.97866
FE	47	molar	0.005	0.0755	0.1297	0.137477	1.20143	1.14087
FE	11	anterior	0.059	0.044	0.072	0.340981	0.117678	2.67523
FE	12	anterior	0.0014	0.0309	0.074	0.0473496	0.920447	0.623593
FE	13	anterior	0.025	0.037	0.161	1.46303	4.31425	0.0342797
FE	15	premolar	0.008	0.0467	0.072	0.458882	0.680894	1.33834
FE	16	molar	0.044	0.176	0.025	0.261509	0.516824	0.509335
FE	17	molar	0.1124	0.1	0.1008	0.603625	1.58533	1.16271
FE	21	anterior	0.007	0.0118	0.267	1.40762	1.20499	0.680667
FE	23	anterior	0.0117	0.154	0.119	0.729129	2.60424	2.67644
FE	25	premolar	0.059	0.053	0.2362	0.560431	0.61908	0.370615
FE	26	molar	0.015	0.071	0.1652	0.00782119	0.47329	1.62425
FE	27	molar	0.104	0.032	0.244	0.512019	0.282402	1.31359
FE	31	anterior	0.189	0.229	0.1639	1.05463	0.908409	4.49804
FE	33	anterior	0.1016	0.291	0.0821	0.0323502	5.73779	0.13998
FE	34	premolar	0.1304	0.0625	0.0671	2.44008	2.50436	2.58898
FE	36	molar	0.0641	0.073	0.121	0.745901	0.179154	1.05419
FE	42	anterior	0.0292	0.222	0.1073	3.31366	0.684533	1.83585
FE	43	anterior	0.007	0.228	0.0972	3.04045	2.96798	1.79435
FE	45	premolar	0.215	0.1201	0.0589	1.47338	0.597928	9.22483
FE	46	molar	0.196	0.117	0.032	1.54879	0.140917	0.744855
FE	47	molar	0.153	0.083	0.0832	0.491972	0.117182	1.13339
FE	11	anterior	0.0348	0.2098	0.0067	1.41527	0.378483	0.52339
FE	12	anterior	0.157	0.2539	0.1	0.141932	1.5258	0.252116
FE	13	anterior	0.068	0.0001	0.166	1.46346	3.03645	0.287036
FE	15	premolar	0.0443	0.1754	0.1401	2.65898	2.01966	3.14478
FE	16	molar	0.0467	0.015	0.141	1.08536	1.36147	2.35422
FE	17	molar	0.2363	0.12	0.294	1.45198	1.3203	1.82652
FE	21	anterior	0.0193	0.1558	0.089	2.74639	1.67496	1.80416
FE	22	anterior	0.1658	0.1275	0.035	1.75999	0.517125	1.38354
FE	23	anterior	0.0871	0.0192	0.366	1.01399	5.63614	3.14347
FE	25	premolar	0.033	0.156	0.1065	2.6799	3.72289	5.27018
FE	26	molar	0.0923	0.2261	0.095	0.31371	0.528367	2.70432
FE	27	molar	0.001	0.0774	0.323	0.702431	0.462949	1.73907
FE	31	anterior	0.054	0.135	0.1946	2.63846	0.833139	0.147036
FE	32	anterior	0.084	0.006	0.0157	1.64015	0.465312	2.25637
FE	33	anterior	0.004	0.074	0.0056	0.309773	0.384365	0.330644
FE	34	premolar	0.0444	0.009	0.135	1.73405	1.87293	1.51912
FE	35	premolar	0.071	0.0338	0.0227	5.68781	3.00333	2.39713
FE	36	molar	0.0691	0.227	0.132	0.812268	0.295825	0.85725
FE	41	anterior	0.1382	0.2	0.3617	3.62154	1.91678	2.46705
FE	42	anterior	0.051	0.128	0.2875	2.92623	2.29563	2.25197
FE	43	anterior	0.1207	0.081	0.1823	0.828953	1.82124	2.25474
FE	44	premolar	0.4034	0.0622	0.152	2.56705	1.35011	0.948385
FE	45	premolar	0.1685	0.07	0.0055	1.0054	0.449766	2.65305
FE	46	molar	0.045	0.1405	0.155	0.293432	2.22689	3.87466
FE	47	molar	0.0175	0.1415	0.074	0.434593	1.49454	3.62768
PE	11	anterior	0.0749	0.163	0.079	3.54307	1.15296	2.08992
PE	12	anterior	0.04	0.0165	0.054	1.26463	1.94569	1.97038
PE	13	anterior	0.141	0.025	0.276	0.905522	3.44005	1.55319
PE	14	premolar	0.031	0.0631	0.1202	2.28534	1.41471	5.89171
PE	15	premolar	0.0825	0.032	0.1435	1.94011	1.92509	0.043638
PE	16	molar	0.1365	0.221	0.104	0.311	0.573128	2.24695
PE	17	molar	0.1454	0.03	0.222	0.736322	4.17161	0.224615
PE	21	anterior	0.011	0.045	0.0063	15.2482	1.91018	0.520887
PE	22	anterior	0.023	0.107	0.007	0.592676	1.97937	2.17074
PE	23	anterior	0.0479	0.092	0.143	0.0508448	6.21829	2.23539
PE	24	premolar	0.067	0.0585	0.0382	0.245471	0.897051	4.58921
PE	25	premolar	0.143	0.071	0.0488	0.608182	1.26092	0.517332
PE	26	molar	0.1357	0.179	0.077	3.85553	0.638906	2.30616
PE	27	molar	0.186	0.0283	0.322	2.06637	0.396186	1.20573
PE	31	anterior	0.121	0.195	0.0242	1.82929	5.38815	1.47802
PE	32	anterior	0.044	0.191	0.105	0.874313	0.105125	1.16634
PE	33	anterior	0.1641	0.232	0.056	0.230971	0.897786	0.851377
PE	34	premolar	0.027	0.0412	0.0511	2.51905	3.38542	0.756721
PE	35	premolar	0.015	0.019	0.079	0.018633	0.286083	3.2483
PE	36	molar	0.045	0.063	0.0267	0.353961	0.519946	1.32732
PE	37	molar	0.036	0.023	0.0631	0.986054	0.186868	2.40856
PE	41	anterior	0.024	0.154	0.0407	0.00761529	0.766245	2.1182
PE	42	anterior	0.026	0.085	0.011	1.79368	1.64416	1.66014
PE	43	anterior	0.054	0.0493	0.272	1.66174	3.27959	6.65288
PE	44	premolar	0.1164	0.0419	0.1195	0.615331	0.342209	10.1652
PE	45	premolar	0	0.0137	0.1878	0.600588	0.103817	1.63596
PE	46	molar	0.013	0.084	0.0967	0.503818	0.468785	0.0488466
PE	47	molar	0.014	0.274	0.079	0.784891	0.495969	1.46721
PE	11	anterior	0.025	0.075	0.15	1.82181	1.60183	1.85559
PE	12	anterior	0.012	0.003	0.162	0.670495	2.3453	3.95429
PE	13	anterior	0.0871	0.036	0.001	0.520653	1.46845	2.1328
PE	14	premolar	0.024	0.0794	0.0909	2.22095	0.536916	2.38836
PE	15	premolar	0.2317	0.08	0.193	4.18926	0.350156	4.23119
PE	16	molar	0.088	0.11	0.3221	0.531275	0.136542	4.30718
PE	17	molar	0.0302	0.0039	0.2011	0.629906	4.035	2.87236
PE	21	anterior	0.0602	0.06	0.042	0.192727	0.799361	0.133283
PE	22	anterior	0.0338	0.047	0.0031	0.909111	1.90673	2.57802
PE	23	anterior	0.228	0.12	0.0834	1.6279	0.849	2.34801
PE	24	premolar	0.098	0.133	0.0225	4.35343	2.07973	1.30192
PE	25	premolar	0.046	0.061	0.0881	0.133237	1.34025	2.47575
PE	26	molar	0.0387	0.206	0.113	2.61809	1.44753	0.369306
PE	27	molar	0.006	0.038	0.221	0.173755	0.666156	1.14687
PE	31	anterior	0.0924	0.089	0.052	0.53196	0.56031	1.96073
PE	32	anterior	0.0805	0.19	0.014	1.37371	0.493054	2.51152
PE	33	anterior	0.0114	0.089	0.25	2.52097	0.468681	4.3531
PE	34	premolar	0.0784	0.1032	0.1269	0.755198	1.6202	1.29407
PE	35	premolar	0.0842	0.072	0.1183	0.980732	1.27325	0.425104
PE	36	molar	0.0954	0.032	0.066	0.760892	1.18616	3.33816
PE	37	molar	0.156	0.116	0.1143	1.70843	0.667999	2.43986
PE	41	anterior	0.043	0.172	0.0821	1.52602	0.0568035	0.853108
PE	43	anterior	0.0973	0.158	0.0007	0.612817	2.69734	3.71838
PE	44	premolar	0.1555	0.186	0.243	3.14615	0.721316	0.148677
PE	45	premolar	0.1524	0.112	0.144	1.4438	0.992077	2.56382
PE	46	molar	0.0057	0.002	0.2889	0.359735	0.331464	3.92635
PE	47	molar	0.046	0.09	0.1174	0.239081	1.4729	3.79164
PE	11	anterior	0.053	0.123	0.0756	0.559159	0.507576	0.477502
PE	12	anterior	0.072	0.064	0.045	0.0925239	0.380715	0.629706
PE	13	anterior	0.0557	0.0004	0.406	1.3457	0.685699	0.875864
PE	15	premolar	0.1767	0.014	0.1305	0.0372836	1.50239	1.98706
PE	16	molar	0.0045	0.0686	0.3204	1.64136	0.289568	8.31574
PE	17	molar	0.1103	0.047	0.1595	1.36171	3.84724	3.52925
PE	21	anterior	0.099	0.083	0.001	1.05983	1.08172	1.60896
PE	22	anterior	0.3028	0.089	0.0336	1.34902	2.63813	2.49089
PE	24	premolar	0.147	0.0588	0.1451	2.25842	0.380148	10.9363
PE	25	premolar	0.366	0.084	0.239	1.4519	2.39214	2.05914
PE	26	molar	0.15	0.255	0.11	0.717357	2.02909	1.56425
PE	27	molar	0.146	0.141	0.064	2.3942	0.873855	0.0565692
PE	31	anterior	0.0133	0.174	0.134	1.2644	1.46233	8.79061
PE	32	anterior	0.0698	0.273	0.123	0.552967	1.9727	4.92256
PE	33	anterior	0.0493	0.039	0.221	2.28298	0.862259	3.36077
PE	34	premolar	0.1116	0.0006	0.447	3.50381	0.570811	7.74553
PE	35	premolar	0.0212	0.035	0.007	2.61821	1.80565	3.15943
PE	36	molar	0.0299	0.004	0.388	0.722935	0.340829	4.20274
PE	37	molar	0.0717	0.139	0.124	1.33134	0.251748	2.29327
PE	41	anterior	0.0245	0.082	0.002	1.1936	0.555566	3.38191
PE	42	anterior	0.0592	0.0088	0.0458	1.18513	1.69976	0.0521621
PE	43	anterior	0.0708	0.026	0.0146	2.16688	0.317257	0.948473
PE	44	premolar	0.0392	0.001	0.2963	3.79971	0.401234	2.79451
PE	45	premolar	0.0551	0.117	0.146	0.379103	0.132892	3.01468
PE	46	molar	0.02	0.104	0.006	0.254692	0.756834	1.38865
PE	47	molar	0.0483	0.095	0.004	0.309661	0.326853	0.788312
PE	11	anterior	0.089	0.05	0.1438	0.980979	1.12404	2.81241
PE	12	anterior	0.0026	0.0043	0.116	0.231925	0.613948	0.470691
PE	13	anterior	0.1702	0.0038	0.128	0.668284	3.46251	2.05582
PE	15	premolar	0.0526	0.0558	0.1105	1.58379	1.05028	3.57367
PE	16	molar	0.0018	0.007	0.021	0.836692	2.01678	3.63367
PE	17	molar	0.048	0.101	0.263	3.95553	2.09988	3.13767
PE	21	anterior	0.059	0.143	0.007	1.00839	0.150197	0.891738
PE	22	anterior	0.045	0.027	0.0789	1.49345	4.23692	1.42601
PE	23	anterior	0.013	0.079	0.212	1.5589	2.16639	0.519285
PE	25	premolar	0.023	0.1493	0.093	0.554029	3.52123	8.63414
PE	26	molar	0.051	0.0244	0.1119	1.4016	0.0589167	7.34219
PE	27	molar	0.0935	0.0461	0.115	0.24883	2.38876	1.85562
PE	31	anterior	0.0622	0.199	0.0509	1.35087	0.779311	1.99172
PE	32	anterior	0.0224	0.087	0.0233	4.70493	1.04483	0.386335
PE	33	anterior	0.0586	0.076	0.189	2.8842	2.74906	0.697426
PE	34	premolar	0.2557	0.0484	0.0194	4.64363	1.04746	0.0121033
PE	36	molar	0.1876	0.116	0.2524	1.38906	1.7854	5.24521
PE	37	molar	0.1605	0.244	0.0072	1.32506	1.04784	1.69605
PE	41	anterior	0.113	0.082	0.038	1.63631	0.168803	1.02737
PE	42	anterior	0.0784	0.176	0.069	0.376834	0.135557	0.028333
PE	43	anterior	0.0586	0.103	0.06	2.87661	2.74426	2.19846
PE	44	premolar	0.0257	0.0407	0.2076	2.19701	2.6437	3.57003
PE	46	molar	0.127	0.006	0.0164	0.349354	1.77891	1.02586
PE	47	molar	0.152	0.159	0.134	1.06599	1.6791	5.84006
PE	11	anterior	0.0234	0.004	0.002	0.6627	0.155397	0.135017
PE	12	anterior	0.1216	0.055	0.0233	3.39291	0.0716118	0.655119
PE	13	anterior	0.1175	0.044	0.101	1.84544	1.2739	1.83204
PE	15	premolar	0.0032	0.1816	0.1404	0.630214	0.848309	4.76788
PE	16	molar	0.0042	0.039	0.3105	2.21687	0.41834	5.0855
PE	17	molar	0.022	0.023	0.05	0.768282	1.91948	1.18935
PE	21	anterior	0.028	0.0123	0.052	0.477753	1.66752	0.561406
PE	22	anterior	0.052	0.047	0.0242	0.335297	0.82759	0.154372
PE	23	anterior	0.061	0.1274	0.064	0.202737	1.85083	0.978303
PE	25	premolar	0.097	0.039	0.0033	0.675476	0.00750997	0.332635
PE	26	molar	0.0376	0.057	0.003	0.759464	0.904308	1.75244
PE	27	molar	0.067	0.0704	0.0889	1.73313	4.01431	3.53332
PE	31	anterior	0.0796	0.0906	0.2161	3.6618	0.773751	1.92946
PE	32	anterior	0.081	0.1487	0.0149	1.75	0.705221	1.49409
PE	33	anterior	0.0289	0.1559	0.1247	1.79913	0.514559	3.75079
PE	36	molar	0.088	0.0613	0.0934	1.09592	0.814947	3.27103
PE	37	molar	0.073	0.269	0	1.33645	1.71358	3.57149
PE	41	anterior	0.083	0.05	0.05	0.229773	1.21807	0.718158
PE	42	anterior	0.005	0.129	0.025	1.47806	0.526602	0.677229
PE	43	anterior	0.0168	0.0148	0.0216	1.16594	0.974536	1.4795
PE	46	molar	0.0171	0.1354	0.1546	0.665163	0.0379121	3.4819
PE	47	molar	0.094	0.075	0.1047	1.28025	0.492694	1.3821
PE	11	anterior	0.007	0.026	0.045	0.222651	1.3938	1.7083
PE	12	anterior	0.0723	0.0561	0.147	0.943278	0.79413	0.179431
PE	13	anterior	0.025	0.0143	0.11	0.604403	0.986547	1.04574
PE	15	premolar	0.0496	0.033	0.2923	0.323904	1.18602	6.42493
PE	16	molar	0.2432	0.109	0.2568	0.865388	0.681806	5.34487
PE	17	molar	0.0097	0.0795	0.1033	0.232616	0.0454182	4.07187
PE	21	anterior	0.01	0.019	0.0161	0.654278	1.52509	0.398878
PE	22	anterior	0.0464	0.0583	0.071	0.523739	2.2236	1.73131
PE	23	anterior	0.0416	0.051	0.11	0.0776023	1.01134	1.51595
PE	25	premolar	0.0148	0.0346	0.141	2.94388	1.65579	7.61673
PE	26	molar	0.116	0.115	0.1824	0.661677	0.882742	3.49882
PE	27	molar	0.0229	0.005	0.011	1.33638	0.0430807	7.27496
PE	31	anterior	0.0679	0.176	0.2006	3.99306	0.313574	1.83992
PE	32	anterior	0.1018	0.095	0.012	1.48765	1.00423	2.2762
PE	33	anterior	0.0043	0.226	0.013	2.30676	1.36271	3.62475
PE	35	premolar	0.3553	0.111	0.4574	0.883383	0.913649	4.80307
PE	36	molar	0.1878	0.191	0.1316	2.42602	0.332453	3.2506
PE	37	molar	0.038	0.488	0.103	0.947375	0.0695909	1.25385
PE	41	anterior	0.057	0.152	0.1718	1.32646	1.02158	1.68166
PE	42	anterior	0.106	0.147	0.0742	1.64211	0.707176	1.57408
PE	43	anterior	0.077	0.186	0.1408	1.58579	1.33022	4.34725
PE	44	premolar	0.059	0.2219	0.1966	1.29244	1.52912	2.49972
PE	45	premolar	0.022	0.067	0.051	1.21715	1.37061	2.1769
PE	47	molar	0.049	0.16	0.396	1.8014	0.247444	7.46315
PE	11	anterior	0.0484	0.191	0.1234	1.34342	1.62009	1.04385
PE	12	anterior	0.0303	0.157	0.0204	0.476296	1.28231	1.3309
PE	13	anterior	0.006	0.129	0.009	0.799533	1.72938	2.66352
PE	15	premolar	0.021	0.004	0.1052	0.188067	0.376684	5.13055
PE	16	molar	0.0369	0.205	0.128	0.0459593	1.41208	2.76446
PE	17	molar	0.0217	0.057	0.0487	0.980339	1.91679	1.03536
PE	21	anterior	0.22	0.437	0.4515	3.85863	3.49361	1.86634
PE	22	anterior	0.054	0.081	0.113	1.82245	0.360788	0.450616
PE	23	anterior	0.015	0.213	0.2291	1.54015	1.84439	1.9729
PE	25	premolar	0.0295	0.081	0.171	1.28279	0.263439	5.5513
PE	26	molar	0.2005	0.102	0.0396	0.963016	2.96859	2.01596
PE	27	molar	0.1838	0.109	0.025	2.0504	2.87406	1.89373
PE	31	anterior	0.096	0.194	0.084	0.920668	1.83312	0.371514
PE	32	anterior	0.057	0.203	0.0156	0.154032	0.380075	0.678934
PE	33	anterior	0.114	0.109	0.101	0.320279	2.4093	1.26501
PE	34	premolar	0.1443	0.013	0.04	3.41147	0.746717	4.02331
PE	36	molar	0.1049	0.222	0.012	0.870369	0.304969	0.140316
PE	37	molar	0.007	0.133	0.118	1.57803	0.447749	4.28411
PE	41	anterior	0.2572	0.19	0.1387	3.99645	0.251126	4.42835
PE	42	anterior	0.0035	0.406	0.1183	2.4007	1.64322	8.09516
PE	44	premolar	0.013	0.1092	0.2933	0.561484	1.06014	5.91593
PE	46	molar	0.02	0.026	0.0004	0.624565	1.4233	2.18211
PE	47	molar	0.0068	0.024	0.129	0.403831	0.535187	1.78089
PE	11	anterior	0.0132	0.0177	0.103	1.61283	0.566172	0.805131
PE	12	anterior	0.0233	0.0457	0.176	2.42557	2.49291	2.22121
PE	13	anterior	0.124	0.161	0.0471	2.42776	1.11311	0.300749
PE	14	premolar	0.098	0.0606	0.2471	1.71063	1.9526	8.89845
PE	15	premolar	0.0834	0.066	0.0238	0.998009	0.53983	0.9371
PE	16	molar	0.0261	0.181	0.1118	1.45273	0.935086	4.71548
PE	17	molar	0.001	0.013	0.0319	0.258164	2.26308	7.12324
PE	21	anterior	0.0275	0.016	0.126	0.191425	0.744839	3.01667
PE	22	anterior	0.014	0.0612	0.091	1.70516	2.51797	1.67334
PE	23	anterior	0.0304	0.067	0.05	0.150707	2.02341	3.10888
PE	24	premolar	0.1166	0.0239	0.2528	5.00007	1.47551	6.2274
PE	25	premolar	0.032	0.199	0.1083	4.2432	2.03817	7.45269
PE	26	molar	0.096	0.064	0.2294	1.81407	1.55198	4.07649
PE	27	molar	0.031	0.057	0.1275	0.962049	2.71424	1.67965
PE	31	anterior	0.053	0.245	0.051	2.17147	1.35825	7.29088
PE	32	anterior	0.183	0.151	0.0641	1.31304	1.36219	1.86285
PE	33	anterior	0.113	0.224	0.045	1.93017	1.1891	7.00339
PE	34	premolar	0.0569	0.053	0.1293	1.87923	1.20734	1.87498
PE	35	premolar	0.012	0.0656	0.1194	0.329712	0.00731089	2.95977
PE	36	molar	0.015	0.0146	0.1908	0.274239	1.66655	4.85919
PE	37	molar	0.048	0.122	0.0041	0.716167	0.268008	1.9748
PE	41	anterior	0.033	0.228	0.2062	1.35338	1.25932	3.86644
PE	42	anterior	0.104	0.158	0.0058	1.43903	1.07988	3.28052
PE	44	premolar	0.005	0.127	0.0512	2.18726	0.778599	3.64577
PE	45	premolar	0.087	0.101	0.0174	3.79059	1.30405	2.19944
PE	46	molar	0.142	0.066	0.0268	1.58962	1.44534	0.893055
PE	47	molar	0.0303	0.303	0.153	0.207561	0.420423	0.096106
PE	11	anterior	0.0566	0.001	0.113	0.966546	2.09837	2.11063
PE	12	anterior	0.026	0.011	0.1904	0.448351	3.79422	6.10019
PE	13	anterior	0.1394	0.103	0.016	0.129679	0.0825759	9.25934
PE	14	premolar	0.0361	0.0051	0.1009	0.268917	0.80742	4.57462
PE	15	premolar	0.0597	0.0038	0.04	2.60855	0.381695	0.970835
PE	16	molar	0.118	0.081	0.043	2.30694	0.462039	2.31011
PE	17	molar	0.1664	0.0701	0.181	0.473949	0.861877	1.73963
PE	21	anterior	0.061	0.048	0.192	0.77806	2.28099	3.41948
PE	22	anterior	0.027	0.047	0.236	0.0986413	0.202453	6.48363
PE	23	anterior	0.16	0.042	0.114	0.703826	1.01684	2.03704
PE	24	premolar	0.259	0	0.0521	3.47025	0.45526	1.79231
PE	25	premolar	0.065	0.0079	0.1182	0.127058	0.730397	5.45043
PE	26	molar	0.021	0.033	0.0562	1.54007	0.615066	2.61153
PE	27	molar	0.0033	0.0785	0.078	1.55889	3.15829	2.14462
PE	31	anterior	0.056	0.174	0.0352	2.25853	2.72489	0.555295
PE	32	anterior	0.1071	0.168	0.1305	1.53968	2.76899	1.94804
PE	33	anterior	0.2133	0.208	0.0347	5.26584	2.02179	0.960535
PE	34	premolar	0.052	0.105	0.106	0.731816	0.802328	1.18652
PE	35	premolar	0.1778	0.021	0.051	0.544122	0.868095	2.0884
PE	36	molar	0.1026	0.09	0.128	0.263729	0.563328	1.40316
PE	37	molar	0.1072	0.072	0.114	1.17527	0.471497	1.92286
PE	41	anterior	0.0189	0.193	0.0738	0.971615	1.78806	1.04049
PE	42	anterior	0.051	0.187	0.1191	1.57533	2.41346	3.52203
PE	43	anterior	0.1289	0.02	0.214	1.85002	2.86653	1.99005
PE	44	premolar	0.0641	0.021	0.231	1.31338	1.88028	1.1401
PE	45	premolar	0.0636	0	0.1382	0.228262	0.807411	1.43069
PE	46	molar	0.058	0.134	0.036	0.360599	0.361027	0.178785
PE	47	molar	0.005	0.086	0.075	1.24938	0.142998	2.42344
PE	11	anterior	0.072	0.006	0.0555	0.676461	1.16005	0.477913
PE	12	anterior	0.0474	0.1188	0.079	1.11944	3.1756	0.0989244
PE	13	anterior	0.028	0.3434	0.279	0.139767	2.26918	0.171495
PE	14	premolar	0.044	0.2782	0.1085	0.164988	1.25229	0.208918
PE	15	premolar	0.1963	0.051	0.172	2.23072	1.18604	0.889012
PE	16	molar	0.161	0.024	0.259	0.803099	1.12098	6.97532
PE	17	molar	0.105	0.0117	0.213	0.640602	2.66925	3.39881
PE	21	anterior	0.0618	0.0566	0.0649	1.51613	1.37208	0.65711
PE	22	anterior	0.1866	0.124	0.102	1.64822	0.661874	0.479251
PE	23	anterior	0.186	0.06	0.215	1.43981	2.51485	1.47875
PE	24	premolar	0.265	0.0278	0.256	0.122433	0.441476	3.28837
PE	25	premolar	0.488	0.085	0.533	1.79046	5.62153	7.50395
PE	26	molar	0.027	0.097	0.165	0.117409	1.47435	3.31252
PE	27	molar	0.238	0.0077	0.248	0.378383	1.1597	3.64909
PE	31	anterior	0.0909	0.232	0.0582	0.492206	4.18658	0.946225
PE	32	anterior	0.0189	0.101	0.1378	1.53182	0.0959316	4.59879
PE	33	anterior	0.09	0.0085	0.018	0.730174	1.5743	0.65631
PE	34	premolar	0.067	0.064	0.1662	3.2335	4.90768	0.717116
PE	35	premolar	0.0054	0.1962	0.026	0.16312	3.04117	1.42022
PE	36	molar	0.118	0.2737	0.1923	0.466453	0.0681498	8.41328
PE	37	molar	0.139	0.2006	0.049	0.694552	0.132171	10.9395
PE	42	anterior	0.019	0.112	0.1497	0.955855	3.08974	3.46377
PE	43	anterior	0.067	0.012	0.0368	1.78876	0.426673	1.06957
PE	44	premolar	0.1598	0.0515	0.033	4.04477	8.83309	4.73029
PE	45	premolar	0.269	0.005	0.221	1.10343	3.18424	0.306853
PE	46	molar	0.1641	0.1837	0.107	2.738	1.15772	10.7794
PE	47	molar	0.189	0.012	0.12	3.34261	0.536188	4.37129

## Sheet: Reliability
mesial-distal	in-out	height	rotation	tip	torque	mesial-distal_1	in-out_1	height_1	rotation_1	tip_1	torque_1	mesial-distal_2	in-out_2	height_2	rotation_2	tip_2	torque_2
0.0272	0.099	0.072	1.9702	0.6191	4.4829	0.007	0.089	0.0035	2.053	0.3994	5.0113	0.0023	0.1041	0.1536	2.2552	1.5488	2.007
0.0103	0.136	0.0606	0.0751	0.6385	1.3184	0.0343	0.1555	0.0141	0.0101	1.5729	0.4872	0.0348	0.1379	0.0354	0.5102	0.0634	0.816
0.079	0.2346	0.089	1.6801	0.9286	6.202	0.0771	0.2295	0.1194	1.0486	1.1672	4.4734	0.1035	0.2687	0.1404	2.1444	2.1707	8.5499
0.259	0	0.0521	3.4702	0.4553	1.7923	0.2685	0.0166	0.006	3.0756	0.3226	0.1364	0.2284	0.0055	0.1034	3.6179	1.2764	0.052
0.027	0.146	0.314	0.0231	0.3201	2.5019	0.0405	0.1892	0.3822	0.6879	1.2506	0.4262	0.0339	0.1932	0.3715	0.4021	0.5323	3.0202
0.1164	0.0419	0.1195	0.6153	0.3422	10.1652	0.1038	0.0334	0.1713	0.9415	0.8403	8.6908	0.0955	0.0429	0.0872	0.4398	0.909	11.6872
0.1641	0.1837	0.107	2.738	1.1577	10.7794	0.1388	0.1448	0.0757	3.3831	1.7185	10.6844	0.1312	0.134	0.1392	2.6911	1.5964	13.053
0.0189	0.193	0.0738	0.9716	1.7881	1.0405	0.0401	0.2389	0.1349	0.9607	1.5105	1.2729	0.0159	0.2069	0.1331	1.8049	2.6701	0.2937
0.09	0.1243	0.073	0.8559	0.454	2.3874	0.0645	0.1178	0.1167	1.0504	1.4747	0.3801	0.0936	0.1313	0.1569	1.1775	0.8562	4.2241
0.059	0.053	0.2362	0.5604	0.6191	0.3706	0.0426	0.0694	0.2279	1.3098	1.1859	0.5296	0.0556	0.082	0.2563	0.4321	0.3254	2.148
0.0257	0.0407	0.2076	2.197	2.6437	3.57	0.0042	0.0762	0.2261	2.8945	1.7771	5.3613	0.0472	0.0002	0.1237	1.8012	1.8679	1.5285
0.036	0.0223	0.192	2.9213	0.2747	1.0286	0.0488	0.0594	0.2115	2.899	0.4087	2.7658	0.0704	0.0009	0.1393	3.0782	0.2077	1.8057
0.012	0.14	0.179	2.7593	1.828	1.2257	0.0206	0.0915	0.1143	3.187	1.0295	0.7561	0.0095	0.165	0.2453	1.851	2.0656	3.6607
0.26	0.089	0.012	0.3948	2.6449	1.3464	0.2825	0.0982	0.062	0.2954	2.4016	2.0051	0.2597	0.105	0.0423	0.9141	3.1181	1.2653
0.0217	0.057	0.0487	0.9803	1.9168	1.0354	0.0098	0.0135	0.005	1.6378	2.2752	2.0701	0.0055	0.0769	0.0393	0.8245	1.9029	0.5665
0.0997	0.121	0.07	2.2033	0.9666	1.5079	0.0718	0.1186	0.0165	1.5106	1.6586	2.8847	0.0861	0.1467	0.1277	1.684	2.229	2.5817
0.026	0.029	0.0924	0.5757	0.7372	1.1628	0.0007	0.0352	0.087	1.3622	1.1826	2.7333	0.0035	0.0055	0.0188	0.883	1.9975	1.0973
0.0229	0.005	0.011	1.3364	0.0431	7.275	0.0091	0.0538	0.0596	1.4597	0.5896	6.9826	0.0455	0.0515	0.0965	1.5847	0.0468	8.7505
0.0405	0.094	0.1554	0.6515	1.11	4.2981	0.004	0.134	0.1172	1.2594	2.2957	4.0936	0.0434	0.0682	0.2365	1.1331	0.0951	4.8662
0.1358	0.099	0.0437	0.0578	0.4661	1.4142	0.1393	0.0877	0.1159	0.2426	0.715	0.0581	0.1486	0.0607	0.0436	0.6407	0.3557	2.6311
0.258	0.1285	0.2037	4.2137	1.2007	0.5859	0.2744	0.1519	0.1782	4.3912	0.6089	1.5622	0.2435	0.131	0.2565	4.5872	1.4341	0.9062
0.0175	0.1415	0.074	0.4346	1.4945	3.6277	0.0257	0.1556	0.0849	0.1951	0.778	5.993	0.0043	0.1737	0.01	0.9651	1.3257	1.7741
0.0483	0.095	0.004	0.3097	0.3269	0.7883	0.0298	0.0913	0.0235	0.7341	1.0354	1.0311	0.0295	0.0505	0.0706	0.5397	0.2044	0.4339
0.078	0.0002	0.0463	0.6836	5.2505	0.5872	0.0624	0.0208	0.0176	0.809	5.2853	0.7689	0.0799	0.0431	0.0355	0.991	3.9011	2.5614
0.0717	0.139	0.124	1.3313	0.2517	2.2933	0.0932	0.1628	0.1987	1.5473	1.3781	2.3651	0.0958	0.1635	0.1959	1.5678	0.5333	0.9918
0.071	0.0338	0.0227	5.6878	3.0033	2.3971	0.1019	0.07	0.0583	6.2324	3.3074	4.2311	0.0637	0.0455	0.031	6.1806	2.5965	1.3452
0.0234	0.004	0.002	0.6627	0.1554	0.135	0.0181	0.0186	0.0259	0.072	0.7485	2.3039	0.0081	0.0198	0.0295	0.7055	0.7421	0.7879
0.1124	0.1	0.1008	0.6036	1.5853	1.1627	0.1459	0.091	0.1534	0.3883	0.4566	0.11	0.0841	0.0848	0.0585	0.9442	1.1512	2.3853
0.0496	0.033	0.2923	0.3239	1.186	6.4249	0.0496	0.0472	0.2589	0.319	1.8075	6.3582	0.0195	0.0313	0.3622	0.979	1.1177	6.9292
0.1658	0.1275	0.035	1.76	0.5171	1.3835	0.2009	0.106	0.0867	2.6357	0.2156	0.5523	0.1625	0.176	0.0228	1.2087	0.5115	1.7563
0.0224	0.107	0.3299	1.4241	2.4143	6.6487	0.0061	0.0768	0.3134	1.6174	1.3308	6.9973	0.0566	0.14	0.3711	1.2999	2.1528	8.6405
0.1337	0.138	0.292	0.3475	1.047	0.2312	0.1733	0.1497	0.2977	0.5111	1.1524	0.865	0.1422	0.1833	0.3333	0.3207	1.2952	2.6487
0.021	0	0.1717	1.3994	0.2842	0.5157	0.0082	0.0025	0.0963	1.8372	0.5295	1.8938	0.0429	0.0221	0.2498	0.532	0.2	1.5454
0.072	0.0169	0.1178	2.7259	6.701	0.2537	0.0775	0.0561	0.0599	2.5398	6.728	1.4235	0.0506	0.0272	0.0914	3.1098	6.253	0.0422
0.044	0.176	0.025	0.2615	0.5168	0.5093	0.0532	0.1645	0.0515	0.8978	0.8299	1.7646	0.0711	0.2244	0.0746	0.9084	1.4763	0.2154
0.0557	0.0004	0.406	1.3457	0.6857	0.8759	0.0402	0.0039	0.3609	2.2158	0.3773	2.528	0.0886	0.0397	0.4453	2.1692	2.0294	0.6216
0.0923	0.2261	0.095	0.3137	0.5284	2.7043	0.0588	0.2475	0.0989	0.4477	0.5114	4.2337	0.0869	0.1875	0.0634	0.7212	0.3436	1.8235
0.1223	0.169	0.0109	1.0313	0.3604	2.2568	0.1394	0.1651	0.0284	1.6735	0.0905	3.0045	0.0915	0.1514	0.0363	0.4589	0.4599	3.0188
0.028	0.155	0.5957	2.4865	7.0349	14.5288	0.0373	0.1757	0.5638	2.5631	7.2015	13.8006	0.058	0.1305	0.5559	1.827	7.0583	14.1454
0	0.047	0.2112	0.6532	1.2031	1.2834	0.0365	0.0616	0.2653	0.9904	2.2322	0.1532	0.0025	0.0773	0.1237	1.1433	2.1262	3.4102
0.066	0.1005	0.102	0.4367	2.1609	1.4353	0.0534	0.1293	0.0551	0.6495	1.2526	3.512	0.0327	0.1215	0.1125	0.226	1.6284	0.5148
0.153	0.083	0.0832	0.492	0.1172	1.1334	0.1755	0.1255	0.1066	0.6764	0.3522	2.3125	0.1195	0.1131	0.0019	1.0072	0.4085	1.1749
0.0691	0.227	0.132	0.8123	0.2958	0.8572	0.0734	0.2403	0.2026	0.3409	0.0926	0.8387	0.0507	0.2633	0.1086	0.5322	0.1674	1.1547
0.0026	0.0043	0.116	0.2319	0.6139	0.4707	0.0388	0.0239	0.0488	0.5867	0.2568	2.0208	0.0186	0.0059	0.0401	0.3314	1.5866	2.2452
0.0874	0.162	0.1115	0.2933	0.1849	0.803	0.1242	0.1502	0.081	0.2558	0.216	2.3602	0.0558	0.1827	0.0603	0.7691	0.7105	2.4047
0.0133	0.174	0.134	1.2644	1.4623	8.7906	0.0193	0.1402	0.2041	1.9168	2.1376	9.3607	0.0121	0.1316	0.1318	1.8752	1.3306	10.3578
0.1018	0.095	0.012	1.4877	1.0042	2.2762	0.0862	0.1179	0.0153	1.8638	1.8115	0.4527	0.0931	0.1011	0.0038	1.5352	0.6304	0.1137
0.116	0.115	0.1824	0.6617	0.8827	3.4988	0.0814	0.1215	0.1524	0.132	1.4323	1.3813	0.1441	0.107	0.207	1.3588	0.5887	1.4903
0.142	0.066	0.0268	1.5896	1.4453	0.8931	0.1228	0.0958	0.0327	2.2668	1.7756	0.4942	0.1417	0.0854	0.0337	2.0474	1.2174	3.4748
0.059	0.143	0.007	1.0084	0.1502	0.8917	0.0837	0.1731	0.0678	1.3277	0.2414	1.5186	0.0311	0.092	0.0244	1.7273	1.189	0.3761
