# Supplementary material for: Comparative analysis of lingual bracket transfer accuracy using fully versus partially enclosed 3D-printed indirect bonding trays: an in vivo study
Source: PeerJ. 2025 Jun 17;13:e19612. doi: 10.7717/peerj.19612 (PMC12180451; doi:10.7717/peerj.19612)
Supplement: Supplemental Information 3 [file peerj-13-19612-s003.xlsx]

## Sheet: codebook
Variable	Code	Description
Group	1	FE
Group	2	PE
Tooth	11	Upper right central incisor
Tooth	12	Upper right lateral incisor
Tooth	13	Upper right canine
Tooth	14	Upper right first premolar
Tooth	15	Upper right second premolar
Tooth	16	Upper right first molar
Tooth	17	Upper right second molar
Tooth	21	Upper left central incisor
Tooth	22	Upper left lateral incisor
Tooth	23	Upper left canine
Tooth	24	Upper left first premolar
Tooth	25	Upper left second premolar
Tooth	26	Upper left first molar
Tooth	27	Upper left second molar
Tooth	31	Lower left central incisor
Tooth	32	Lower left lateral incisor
Tooth	33	Lower left canine
Tooth	34	Lower left first premolar
Tooth	35	Lower left second premolar
Tooth	36	Lower left first molar
Tooth	37	Lower left second molar
Tooth	41	Lower right central incisor
Tooth	42	Lower right lateral incisor
Tooth	43	Lower right canine
Tooth	44	Lower right first premolar
Tooth	45	Lower right second premolar
Tooth	46	Lower right first molar
Tooth	47	Lower right second molar
Tooth Type	1	Anterior (Incisors and Canines)
Tooth Type	2	Premolar
Tooth Type	3	Molar
